# Supplementary material
Source: MDPI journal article supplement (https://www.mdpi.com/2076-3417/12/12/5906)
Supplement: s1 [file s1]

## Supplementary data

### 1. *Sophorae Flavescientis* Ait. identification

*Sophorae Flavescientis* Ait. identification was performed following Chinese Pharmacopoeia 2010.

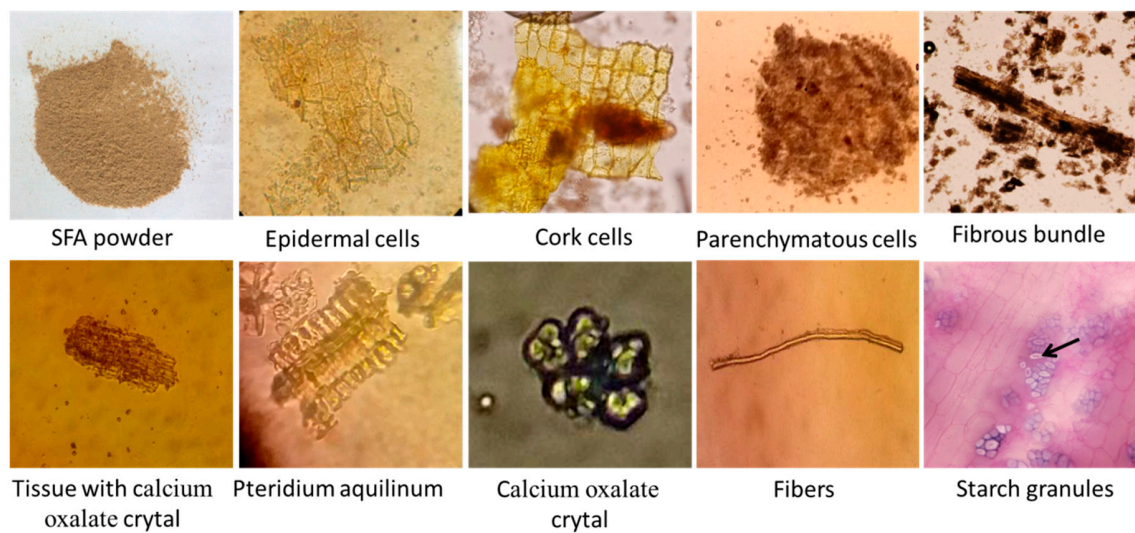

**Figure S1.** Pharmaceutical powder characterization.

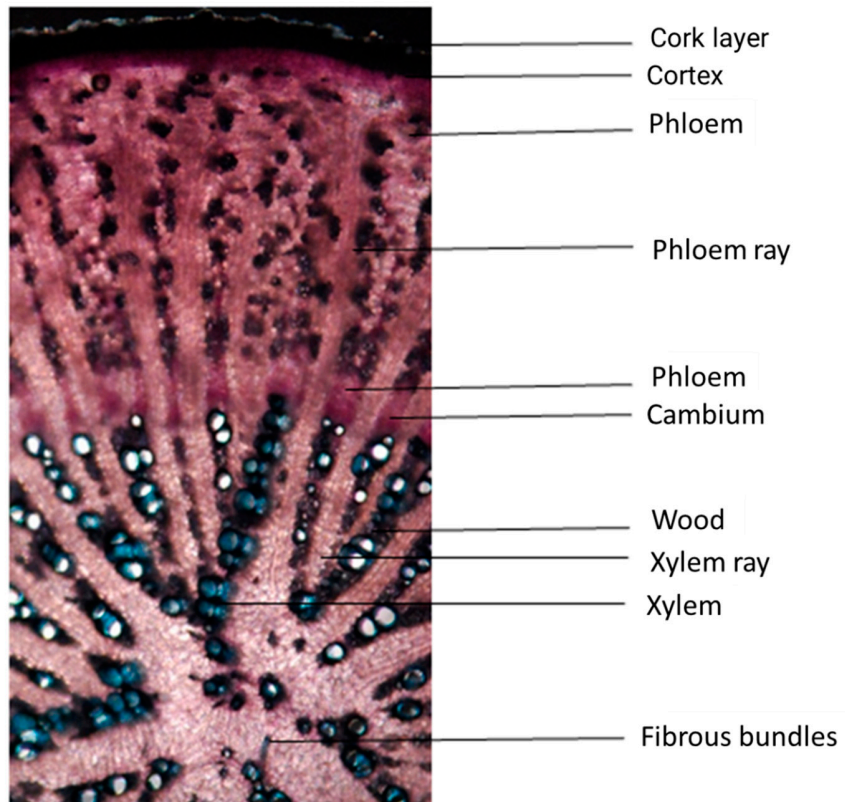

**Figure S2.** A cross-section of SFA root.

### 3. HepG2 growth curves

HepG2 cells were seeded in 96-well plates in different densities,  $5 \times 10^2$ ,  $1 \times 10^3$ ,  $5 \times 10^3$ ,  $1 \times 10^4$ ,  $5 \times 10^4$ . Cells were seeded in triplicates. Cells then were incubated with 100  $\mu$ l fresh medium and 10  $\mu$ l WST-1 for 3.5 hours in CO<sub>2</sub> incubator. The O.D. value was measured at 450 nm by GloMax® Explorer Multimode Microplate Reader (Table S1). The standard curve of cell growth was performed in Figure S3.

**Table S1.** O.D. values of HepG2 cells.

| No. | Cell density (cell number/well) |                 |                 |                 |                 |
|-----|---------------------------------|-----------------|-----------------|-----------------|-----------------|
|     | $5 \times 10^2$                 | $1 \times 10^3$ | $5 \times 10^3$ | $1 \times 10^4$ | $5 \times 10^4$ |
| 1   | 0.207                           | 0.229           | 0.266           | 0.953           | 2.587           |
| 2   | 0.186                           | 0.215           | 0.305           | 0.900           | 3.587           |
| 3   | 0.202                           | 0.249           | 0.284           | 0.929           | 3.773           |

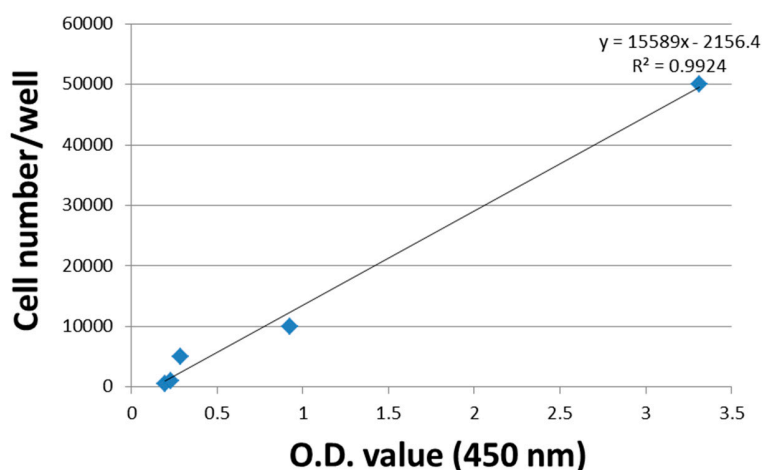

**Figure S3.** The WST-1 standard curve plotted to estimate the cell number for O.D. values obtained from WST-1 assay.

In experimental groups, HepG2 cells were treated with SFA-CHCl<sub>3</sub> extract in triplicates. HepG2 cells without SFA-CHCl<sub>3</sub> extract treatment were used as control group. The O.D. values were shown in Table S2. The HepG2 cell number was calculated from the O.D. values from Table S2 and WST-1 standard curve ( $Y = 15589x - 2156.4$ ). From the cell number in SFA-CHCl<sub>3</sub> extract treatment groups (Table S3), the IC<sub>50</sub> value was calculated as 47.68  $\mu$ g/ml SFA-CHCl<sub>3</sub> extract for HepG2 cells.

**Table S2.** O.D. values of HepG2 cells treated with SFA-CHCl<sub>3</sub> extract.

| No. | SFA-CHCl <sub>3</sub> extract treatment (µg/ml) |       |      |      |      |      |      |
|-----|-------------------------------------------------|-------|------|------|------|------|------|
|     | Control                                         | 3.125 | 6.25 | 12.5 | 25   | 50   | 100  |
| 1   | 1.73                                            | 1.70  | 1.71 | 1.80 | 1.11 | 0.75 | 0.21 |
| 2   | 1.69                                            | 1.66  | 1.71 | 1.69 | 1.16 | 0.74 | 0.22 |
| 3   | 1.74                                            | 1.66  | 1.74 | 1.77 | 1.00 | 0.63 | 0.22 |

**Table S3.** Cell density of HepG2 cells treated with SFA-CHCl<sub>3</sub> extract.

| No. | SFA-CHCl <sub>3</sub> extract treatment (µg/ml) |       |       |       |       |      |      |
|-----|-------------------------------------------------|-------|-------|-------|-------|------|------|
|     | Control                                         | 3.125 | 6.25  | 12.5  | 25    | 50   | 100  |
| 1   | 24813                                           | 24356 | 24558 | 25973 | 15084 | 9567 | 1155 |
| 2   | 24189                                           | 23676 | 24491 | 24195 | 15952 | 9452 | 1277 |
| 3   | 24969                                           | 23690 | 25024 | 25469 | 13423 | 7594 | 1227 |
